# Supplementary material for: Computational and experimental studies of the breathing motion of a protein loop: implications in PfAMA1-PfRON2 late-stage binding event
Source: bioRxiv or medRxiv preprint supplement (doi:10.1101/2021.10.10.463826), 2022-02-28
Supplement: Supplementary file [file media-1.pdf]

# Supporting Informations

## **Computational and experimental studies of the breathing motion of a protein loop: implications in *Pf*AMA1-*Pf*RON2 late-stage binding event**

**Suman Sinha,<sup>†</sup> Anamika Biswas,<sup>†</sup> Jagannath Mondal\*, and Kalyaneswar Mandal\***

*From the Tata Institute of Fundamental Research Hyderabad, 36/p Gopanpally, Hyderabad, Telangana-500046, India*

<sup>†</sup> Equal contribution

\* For correspondence: [jmondal@tifrh.res.in](mailto:jmondal@tifrh.res.in), [kmandal@tifrh.res.in](mailto:kmandal@tifrh.res.in)

---

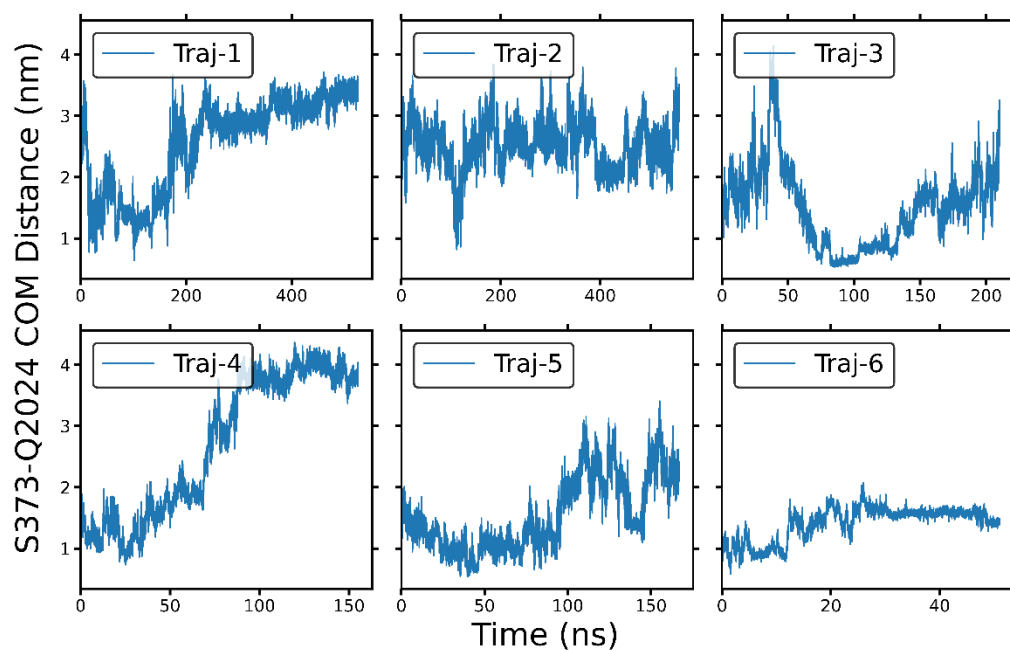

**Figure S1:** Distance profiles between Ser373 and Gln2024 in all trajectories

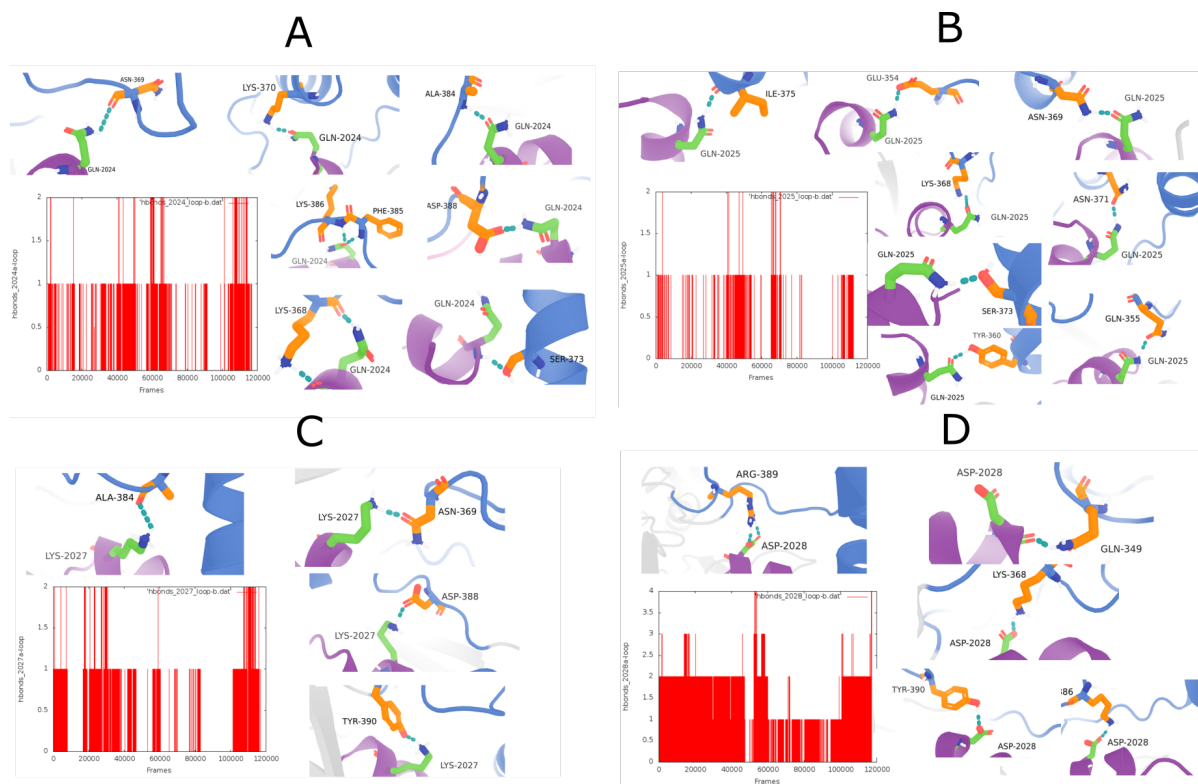

**Figure S2.** Detailed hydrogen bond interactions between Gln2024 (A), Gln2025 (B), Lys2027 (C), Asp2028 (D) with representative residues of DII loop.

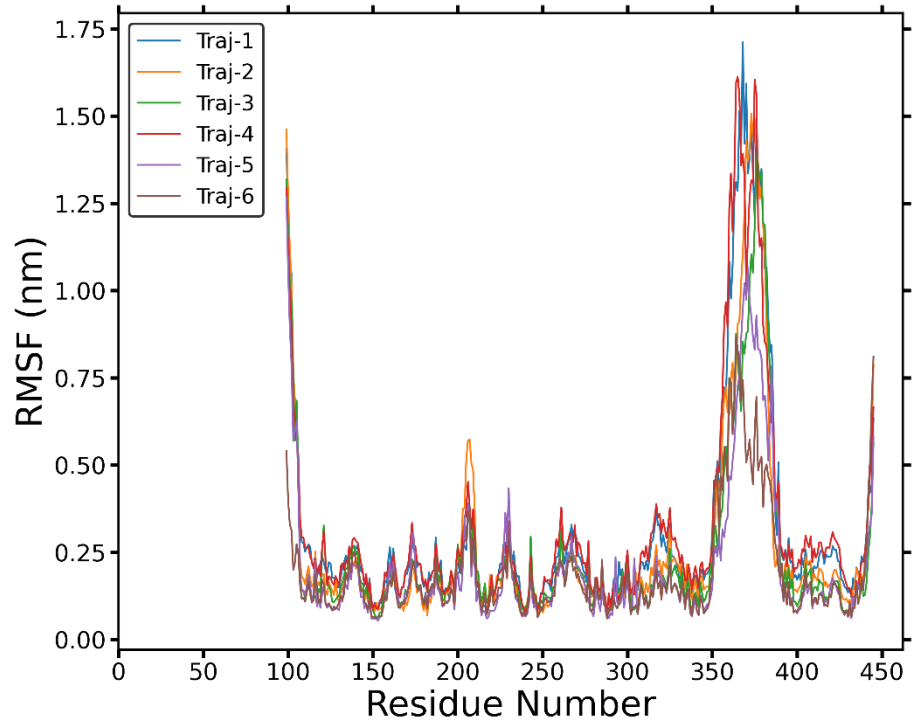

**Figure S3:** Superposition of the RMSF plot from all trajectories

**Table S1.** Trend in change of affinity upon alanine substitution experiments.

| Ligands                             | Fold increase in $K_D$<br>(SPR) | Fold increase in $K_D$<br>(ITC) |
|-------------------------------------|---------------------------------|---------------------------------|
| <i>Pf</i> RON2 <sub>2021-2059</sub> | NA                              | NA                              |
| K2027A                              | 41.07                           | 2.84                            |
| D2028A                              | 10.40                           | 2.78                            |
| Q2024A                              | 6.44                            | 1.98                            |
| Q2025A                              | 3.42                            | 1.75                            |

**Table S2.** Summary of results obtained from multiple repeats of SPR experiments.

| Ligand | Repetitions | $K_a$<br>( $M^{-1} \cdot Sec^{-1}$ ) | $K_d$<br>( $Sec^{-1}$ ) | $K_D$ (nM) |
|--------|-------------|--------------------------------------|-------------------------|------------|
| Q2024A | Set-1       | 74509.7                              | 9.61E-03                | 129        |
|        | Set-2       | 61882                                | 9.26E-03                | 150        |
|        | Set-3       | 60024.9                              | 9.68E-03                | 161        |
|        | Set-4       | 71030.5                              | 8.82E-03                | 124        |
| Q2025A | Set-1       | 1.43E+05                             | 0.01056                 | 74         |
|        | Set-2       | 1.58E+05                             | 0.01065                 | 67         |
|        | Set-3       | 1.87E+05                             | 0.01501                 | 80         |
|        | Set-4       | 1.06E+05                             | 8.22E-03                | 77         |
| K2027A | Set-1       | 10318.3                              | 9.50E-03                | 920        |
|        | Set-2       | 22201.6                              | 0.01951                 | 879        |
|        | Set-3       | 4.00E+04                             | 0.03582                 | 896        |
| D2028A | Set-1       | 49394.9                              | 0.01535                 | 311        |
|        | Set-2       | 6.93E+04                             | 0.01515                 | 219        |
|        | Set-3       | 7.77E+04                             | 0.01193                 | 154        |

**Table S3.** Summary of results obtained from two repeats of ITC experiments.

| Ligand | Set-1                  |                   |                          |                            |                          | Set -2                 |                   |                          |                            |                          |
|--------|------------------------|-------------------|--------------------------|----------------------------|--------------------------|------------------------|-------------------|--------------------------|----------------------------|--------------------------|
|        | K <sub>D</sub><br>(nM) | Molar<br>ratio    | $\Delta H$<br>(kcal/mol) | $-T\Delta S$<br>(kcal/mol) | $\Delta G$<br>(kcal/mol) | K <sub>D</sub><br>(nM) | Molar<br>ratio    | $\Delta H$<br>(kcal/mol) | $-T\Delta S$<br>(kcal/mol) | $\Delta G$<br>(kcal/mol) |
| Q2024A | 271.7                  | 1.28<br>±<br>0.02 | -4.51                    | -4.45                      | -8.96                    | 184.2                  | 1.69<br>±<br>0.04 | -3.33                    | -5.88                      | -9.20                    |
| Q2025A | 227.8                  | 1.01<br>±<br>0.02 | -5.23                    | -3.85                      | -9.08                    | 175.4                  | 0.99<br>±<br>0.03 | -5.61                    | -3.61                      | -9.22                    |
| K2027A | 378.8                  | 0.55<br>±<br>0.04 | -6.58                    | -2.18                      | -8.76                    | 274.7                  | 0.70<br>±<br>0.01 | -6.00                    | -2.96                      | -8.95                    |
| D2028A | 375.9                  | 1.05<br>±<br>0.03 | -6.85                    | -1.91                      | -8.76                    | 265.3                  | 0.85<br>±<br>0.02 | -9.25                    | 0.27                       | -8.97                    |
